# Supplementary material for: Assessment of Trends in Second Primary Cancers in Patients With Metastatic Melanoma From 2005 to 2016
Source: PubMed Central journal article supplement (PMC7726633; doi:10.1001/jamanetworkopen.2020.28627), 2020-12-09
Supplement: jamanetwopen-e2028627-s001.pdf [file jamanetwopen-e2028627-s001.pdf]

## Supplemental Online Content

Deng W, Wang Y, Liu X, et al. Assessment of trends in second primary cancers in patients with metastatic melanoma from 2005 to 2016. *JAMA Netw Open*. 2020;3(12):e2028627. doi:10.1001/jamanetworkopen.2020.28627

**eTable 1.** Univariate Analysis and Multivariate Analysis for Risk of Developing SPM Over Time After Index Cancer

**eTable 2.** SIRs of all SPM Sites After Initial Melanoma Diagnosis Between 2005-2010 and 2011-2016 Time Periods

**eTable 3.** SIRs of Selected SPMs Sites After Initial Melanoma Diagnosis Between Males and Females

This supplemental material has been provided by the authors to give readers additional information about their work.

**eTable 1.** Univariate analysis and multivariate analysis for risk of developing SPM over time after index cancer.

| Parameters           | Risk ratio | 95% CI <sup>a</sup> | <i>P</i> | Risk ratio | 95% CI <sup>a</sup> | <i>P</i> |
|----------------------|------------|---------------------|----------|------------|---------------------|----------|
| Sex                  |            |                     |          |            |                     |          |
| Male                 | Reference  |                     |          | -          |                     |          |
| Female               | 0.74       | 0.54-1.02           | .06      |            |                     |          |
| race                 |            |                     |          |            |                     |          |
| White                | Reference  |                     |          | -          |                     |          |
| Non-white            | 1.03       | 0.48-2.19           | .94      |            |                     |          |
| Age (continuous)     | 1.02       | 1.01-1.03           | <.001    | 1.02       | 1.01-1.03           | <.001    |
| Site melanoma        |            |                     |          |            |                     |          |
| Head and neck        | Reference  |                     |          | Reference  |                     |          |
| Trunk                | 1.11       | 0.68-1.81           | .69      | 1.12       | 0.64-1.93           | .70      |
| Upper limbs/shoulder | 1.29       | 0.73-2.26           | .38      | 1.31       | 0.78-2.21           | .30      |
| Lower limbs/hip      | 0.66       | 0.34-1.28           | .22      | 1.39       | 0.77-2.49           | .27      |
| Other                | 0.65       | 0.42-0.99           | .05      | 0.68       | 0.34-1.38           | .28      |
| Histology            |            |                     |          |            |                     |          |
| SSM                  | Reference  |                     |          | Reference  |                     |          |
| NM                   | 0.64       | 0.33-1.23           | .18      | 0.56       | 1.23-0.61           | .56      |
| LM                   | 0.68       | 0.09-5.12           | .71      | 0.49       | 0.41-1.52           | .49      |
| ALM                  | 0.94       | 0.27-3.21           | .92      | 0.73       | 0.10-5.61           | .77      |
| Melanoma, NOS        | 0.48       | 0.29-0.81           | .006     | 1.47       | 0.40-5.43           | .56      |
| Other                | 0.70       | 0.36-1.39           | .31      | 0.81       | 0.49-1.36           | .43      |
| Initial treatment    |            |                     |          |            |                     |          |
| Surgical treatment   |            |                     |          |            |                     |          |
| Yes                  | Reference  |                     |          | Reference  |                     |          |
| No                   | 0.60       | 0.45-0.80           | <.001    | 1.34       | 0.85-2.09           | .21      |
| Radiation            |            |                     |          |            |                     |          |
| Yes                  | Reference  |                     |          | Reference  |                     |          |
| No                   | 1.74       | 1.22-2.47           | .002     | 0.71       | 0.50-1.03           | .07      |
| Chemotherapy         |            |                     |          |            |                     |          |
| Yes                  | Reference  |                     |          | Reference  |                     |          |
| No                   | 1.55       | 1.10-2.18           | .01      | 1.21       | 0.85-1.72           | .30      |

<sup>a</sup>CI, confidence interval.

**eTable 2.** SIRs of all SPM sites after initial melanoma diagnosis between pre-ICIs and post-ICIs.

| SPM sites                                              | 2005-2010 |                               | 2011-2016 |                                |
|--------------------------------------------------------|-----------|-------------------------------|-----------|--------------------------------|
|                                                        | O         | SIR (95% CI)                  | O         | SIR (95% CI)                   |
| All Sites                                              | 107       | 1.65 (1.35-2) <sup>1</sup>    | 83        | 1.98 (1.57-2.45) <sup>1</sup>  |
| All Sites excluding melanoma                           | 77        | 1.26 (0.99-1.57)              | 56        | 1.42 (1.08-1.85) <sup>1</sup>  |
| All Solid Tumors                                       | 89        | 1.56 (1.25-1.92) <sup>1</sup> | 73        | 1.98 (1.55-2.49) <sup>1</sup>  |
| Oral Cavity and Pharynx                                | 1         | 0.57 (0.01-3.17)              | 1         | 0.8 (0.02-4.44)                |
| Lip                                                    | 0         | 0                             | 0         | 0                              |
| Tongue                                                 | 0         | 0                             | 1         | 2.47 (0.06-13.79)              |
| Salivary Gland                                         | 0         | 0                             | 0         | 0                              |
| Floor of Mouth, and Gum and Other Mouth                | 1         | 3.2 (0.08-17.81)              | 0         | 0                              |
| Floor of Mouth                                         | 0         | 0                             | 0         | 0                              |
| Gum and Other Mouth                                    | 1         | 4.43 (0.11-24.66)             | 0         | 0                              |
| Tonsil                                                 | 0         | 0                             | 0         | 0                              |
| Pharynx                                                | 0         | 0                             | 0         | 0                              |
| Nasopharynx                                            | 0         | 0                             | 0         | 0                              |
| Oropharynx                                             | 0         | 0                             | 0         | 0                              |
| Hypopharynx                                            | 0         | 0                             | 0         | 0                              |
| Other Oral Cavity and Pharynx                          | 0         | 0                             | 0         | 0                              |
| Digestive System                                       | 10        | 0.82 (0.39-1.51)              | 12        | 1.51 (0.78-2.63)               |
| Esophagus                                              | 0         | 0                             | 1         | 1.81 (0.05-10.09)              |
| Stomach                                                | 3         | 2.85 (0.59-8.33)              | 2         | 2.89 (0.35-10.44)              |
| Small Intestine                                        | 1         | 3.24 (0.08-18.04)             | 2         | 9.23 (1.12-33.35) <sup>1</sup> |
| Colon, Rectum and Anus                                 | 4         | 0.64 (0.17-1.64)              | 5         | 1.3 (0.42-3.04)                |
| Colon and Rectum                                       | 4         | 0.66 (0.18-1.7)               | 4         | 1.09 (0.3-2.78)                |
| Colon excluding Rectum                                 | 3         | 0.69 (0.14-2.02)              | 1         | 0.38 (0.01-2.13)               |
| Cecum                                                  | 0         | 0                             | 1         | 1.76 (0.04-9.81)               |
| Appendix                                               | 0         | 0                             | 0         | 0                              |
| Ascending Colon                                        | 1         | 1.17 (0.03-6.5)               | 0         | 0                              |
| Hepatic Flexure                                        | 0         | 0                             | 0         | 0                              |
| Transverse Colon                                       | 0         | 0                             | 0         | 0                              |
| Splenic Flexure                                        | 0         | 0                             | 0         | 0                              |
| Descending Colon                                       | 0         | 0                             | 0         | 0                              |
| Sigmoid Colon                                          | 2         | 1.79 (0.22-6.47)              | 0         | 0                              |
| Large Intestine, NOS                                   | 0         | 0                             | 0         | 0                              |
| Rectum and Rectosigmoid Junction                       | 1         | 0.59 (0.01-3.28)              | 3         | 2.82 (0.58-8.25)               |
| Rectosigmoid Junction                                  | 1         | 2.32 (0.06-12.94)             | 0         | 0                              |
| Rectum                                                 | 0         | 0                             | 3         | 3.69 (0.76-10.79)              |
| Anus, Anal Canal and Anorectum                         | 0         | 0                             | 1         | 6.43 (0.16-35.83)              |
| Rectum, Rectosig Junct, Anus, Anal Canal and Anorectum | 1         | 0.52 (0.01-2.91)              | 4         | 3.28 (0.89-8.4)                |
|                                                        | 2005-2010 |                               | 2011-2016 |                                |

| SPM sites                                                | O         | SIR (95% CI)                  |  | O         | SIR (95% CI)                    |
|----------------------------------------------------------|-----------|-------------------------------|--|-----------|---------------------------------|
| Liver, Gallbladder, Intrahep Bile Duct and Other Biliary | 1         | 0.59 (0.02-3.31)              |  | 1         | 0.83 (0.02-4.61)                |
| Liver                                                    | 0         | 0                             |  | 0         | 0                               |
| Gallbladder                                              | 0         | 0                             |  | 0         | 0                               |
| Intrahep and Extrahep Bile Ducts, and Other Biliary      | 1         | 2.37 (0.06-13.23)             |  | 1         | 3.21 (0.08-17.91)               |
| Intrahepatic Bile Duct                                   | 0         | 0                             |  | 1         | 8.84 (0.22-49.24)               |
| Other Biliary                                            | 1         | 3.46 (0.09-19.25)             |  | 0         | 0                               |
| Pancreas                                                 | 1         | 0.52 (0.01-2.92)              |  | 1         | 0.76 (0.02-4.22)                |
| Retroperitoneum                                          | 0         | 0                             |  | 0         | 0                               |
| Peritoneum, Omentum and Mesentery                        | 0         | 0                             |  | 0         | 0                               |
| Other Digestive Organs                                   | 0         | 0                             |  | 0         | 0                               |
| Respiratory System                                       | 18        | 1.80 (1.06-2.84) <sup>1</sup> |  | 10        | 1.59 (0.76-2.93)                |
| Nose, Nasal Cavity and Middle Ear                        | 0         | 0                             |  | 0         | 0                               |
| Larynx                                                   | 0         | 0                             |  | 1         | 2.75 (0.07-15.33)               |
| Pleura                                                   | 0         | 0                             |  | 0         | 0 (0-1233.33)                   |
| Lung, Bronchus, Trachea, Mediastinum and Other Resp Org  | 18        | 1.92 (1.14-3.04) <sup>1</sup> |  | 9         | 1.54 (0.7-2.92)                 |
| Lung and Bronchus                                        | 18        | 1.93 (1.14-3.05) <sup>1</sup> |  | 9         | 1.54 (0.71-2.93)                |
| Trachea                                                  | 0         | 0                             |  | 0         | 0                               |
| Mediastinum and Other Respiratory Organs                 | 0         | 0                             |  | 0         | 0                               |
| Bones and Joints                                         | 1         | 14.9 (0.38-83.01)             |  | 0         | 0                               |
| Soft Tissue including Heart                              | 1         | 2.57 (0.06-14.29)             |  | 2         | 7.33 (0.89-26.49)               |
| Skin excluding Basal and Squamous                        | 30        | 7.71 (5.2-11.01) <sup>1</sup> |  | 29        | 9.93 (6.65-14.26) <sup>1</sup>  |
| Melanoma of the Skin                                     | 30        | 8.45 (5.7-12.07) <sup>1</sup> |  | 27        | 10.11 (6.66-14.71) <sup>1</sup> |
| Other Non-Epithelial Skin                                | 0         | 0                             |  | 2         | 7.98 (0.97-28.81)               |
| Breast                                                   | 6         | 1.1 (0.41-2.4)                |  | 5         | 1.51 (0.49-3.53)                |
| Female Breast                                            | 6         | 1.13 (0.41-2.45)              |  | 5         | 1.55 (0.5-3.61)                 |
| Male Breast                                              | 0         | 0                             |  | 0         | 0                               |
| Female Genital System                                    | 1         | 0.48 (0.01-2.7)               |  | 2         | 1.56 (0.19-5.63)                |
| Cervix Uteri                                             | 1         | 5.31 (0.13-29.56)             |  | 0         | 0                               |
| Corpus and Uterus, NOS                                   | 0         | 0                             |  | 2         | 2.74 (0.33-9.9)                 |
| Corpus Uteri                                             | 0         | 0                             |  | 2         | 2.83 (0.34-10.21)               |
| Uterus, NOS                                              | 0         | 0                             |  | 0         | 0                               |
| Ovary                                                    | 0         | 0                             |  | 0         | 0                               |
| Vagina                                                   | 0         | 0                             |  | 0         | 0                               |
| Vulva                                                    | 0         | 0                             |  | 0         | 0                               |
| Other Female Genital Organs                              | 0         | 0                             |  | 0         | 0                               |
| Male Genital System                                      | 8         | 0.62 (0.27-1.22)              |  | 7         | 0.9 (0.36-1.86)                 |
| Prostate                                                 | 8         | 0.63 (0.27-1.24)              |  | 7         | 0.92 (0.37-1.89)                |
| Testis                                                   | 0         | 0                             |  | 0         | 0                               |
|                                                          | 2005-2010 |                               |  | 2011-2016 |                                 |

| SPM sites                                     | O         | SIR (95% CI)                   |  | O         | SIR (95% CI)                  |
|-----------------------------------------------|-----------|--------------------------------|--|-----------|-------------------------------|
| Penis                                         | 0         | 0                              |  | 0         | 0                             |
| Other Male Genital Organs                     | 0         | 0                              |  | 0         | 0                             |
| Urinary System                                | 10        | 1.51 (0.72-2.78)               |  | 5         | 1.1 (0.36-2.56)               |
| Urinary Bladder                               | 3         | 0.73 (0.15-2.13)               |  | 1         | 0.35 (0.01-1.97)              |
| Kidney and Renal Pelvis                       | 6         | 2.58 (0.95-5.61)               |  | 4         | 2.49 (0.68-6.37)              |
| Renal Pelvis, Ureter and Other Urinary Organs | 1         | 3.04 (0.08-16.93)              |  | 0         | 0                             |
| Kidney                                        | 6         | 2.77 (1.02-6.03) <sup>1</sup>  |  | 4         | 2.66 (0.73-6.82)              |
| Renal Pelvis                                  | 0         | 0                              |  | 0         | 0                             |
| Ureter                                        | 1         | 9.64 (0.24-53.68)              |  | 0         | 0                             |
| Other Urinary Organs                          | 0         | 0                              |  | 0         | 0                             |
| Eye and Orbit                                 | 0         | 0                              |  | 0         | 0                             |
| Eye and Orbit - Non-Melanoma                  | 0         | 0                              |  | 0         | 0                             |
| Eye and Orbit - Melanoma                      | 0         | 0                              |  | 0         | 0                             |
| Brain and Other Nervous System                | 1         | 1.38 (0.03-7.7)                |  | 1         | 2.08 (0.05-11.61)             |
| Brain                                         | 1         | 1.44 (0.04-8.02)               |  | 1         | 2.16 (0.05-12.05)             |
| Cranial Nerves Other Nervous System           | 0         | 0                              |  | 0         | 0                             |
| Endocrine System                              | 2         | 2 (0.24-7.22)                  |  | 0         | 0                             |
| Thyroid                                       | 2         | 2.13 (0.26-7.7)                |  | 0         | 0                             |
| Thymus, Adrenal Gland and Other Endocrine     | 0         | 0                              |  | 0         | 0                             |
| Thymus                                        | 0         | 0                              |  | 0         | 0                             |
| Adrenal Gland                                 | 0         | 0                              |  | 0         | 0                             |
| Other Endocrine                               | 0         | 0                              |  | 0         | 0                             |
| All Lymphatic and Hematopoietic Diseases      | 17        | 2.86 (1.67-4.58) <sup>1</sup>  |  | 7         | 1.72 (0.69-3.55)              |
| Lymphoma                                      | 4         | 1.31 (0.36-3.36)               |  | 3         | 1.46 (0.3-4.28)               |
| Hodgkin Lymphoma                              | 0         | 0                              |  | 0         | 0                             |
| Hodgkin - Nodal                               | 0         | 0                              |  | 0         | 0                             |
| Hodgkin - Extranodal                          | 0         | 0                              |  | 0         | 0                             |
| Non-Hodgkin Lymphoma                          | 4         | 1.39 (0.38-3.57)               |  | 3         | 1.55 (0.32-4.52)              |
| NHL - Nodal                                   | 3         | 1.56 (0.32-4.55)               |  | 2         | 1.56 (0.19-5.65)              |
| NHL - Extranodal                              | 1         | 1.06 (0.03-5.9)                |  | 1         | 1.51 (0.04-8.42)              |
| Myeloma                                       | 7         | 7.29 (2.93-15.02) <sup>1</sup> |  | 4         | 5.90 (1.61-15.1) <sup>1</sup> |
| Leukemia                                      | 6         | 3.11 (1.14-6.76) <sup>1</sup>  |  | 0         | 0                             |
| Lymphocytic Leukemia                          | 4         | 3.98 (1.09-10.2) <sup>1</sup>  |  | 0         | 0                             |
| Acute Lymphocytic Leukemia                    | 0         | 0                              |  | 0         | 0                             |
| Chronic Lymphocytic Leukemia                  | 4         | 4.57 (1.24-11.7) <sup>1</sup>  |  | 0         | 0                             |
| Other Lymphocytic Leukemia                    | 0         | 0                              |  | 0         | 0                             |
| Non-Lymphocytic Leukemia                      | 2         | 2.16 (0.26-7.79)               |  | 0         | 0                             |
| Acute Non-Lymphocytic Leukemia (ANLL)         | 1         | 1.62 (0.04-9.05)               |  | 0         | 0                             |
| Myeloid and Monocytic Leukemia                | 1         | 1.18 (0.03-6.6)                |  | 0         | 0                             |
|                                               | 2005-2010 |                                |  | 2011-2016 |                               |

| SPM sites                        | O | SIR (95% CI)       |  | O | SIR (95% CI)      |
|----------------------------------|---|--------------------|--|---|-------------------|
| Acute Myeloid Leukemia           | 1 | 1.81 (0.05-10.09)  |  | 0 | 0                 |
| Acute Monocytic Leukemia         | 0 | 0                  |  | 0 | 0                 |
| Chronic Myeloid Leukemia         | 0 | 0                  |  | 0 | 0                 |
| Other Myeloid/Monocytic Leukemia | 0 | 0                  |  | 0 | 0                 |
| Other Leukemia                   | 1 | 11.94 (0.3-66.51)  |  | 0 | 0                 |
| Other Acute Leukemia             | 0 | 0                  |  | 0 | 0                 |
| Aleukemic, Subleukemic and NOS   | 1 | 19.85 (0.5-110.59) |  | 0 | 0                 |
| Mesothelioma                     | 0 | 0                  |  | 1 | 7.47 (0.19-41.61) |
| Kaposi Sarcoma                   | 0 | 0                  |  | 0 | 0                 |
| Miscellaneous                    | 1 | 0.75 (0.02-4.17)   |  | 1 | 1.17 (0.03-6.52)  |

<sup>1</sup>Indicateds a statistically significant value; O: observed number; SIR: Standardized incidence ratio.

**eTable 3.** SIRs of selected SPMs sites after initial melanoma diagnosis between males and females.

| SPM sites                                              | Male |                               | Female |                              |
|--------------------------------------------------------|------|-------------------------------|--------|------------------------------|
|                                                        | O    | SIR (95% CI) <sup>1</sup>     | O      | SIR (95% CI) <sup>1</sup>    |
| All Sites                                              | 138  | 1.80 (1.51-2.12) <sup>1</sup> | 52     | 1.73 (1.3-2.27) <sup>1</sup> |
| All Sites excluding melanoma                           | 96   | 1.34 (1.08-1.63) <sup>1</sup> | 37     | 1.29 (0.91-1.77)             |
| All Solid Tumors                                       | 115  | 1.71 (1.41-2.05) <sup>1</sup> | 47     | 1.76 (1.3-2.34) <sup>1</sup> |
| Oral Cavity and Pharynx                                | 2    | 0.79 (0.1-2.85) <sup>1</sup>  | 0      | 0                            |
| Lip                                                    | 0    | 0                             | 0      | 0                            |
| Tongue                                                 | 1    | 1.24 (0.03-6.91) <sup>1</sup> | 0      | 0                            |
| Salivary Gland                                         | 0    | 0                             | 0      | 0                            |
| Floor of Mouth, and Gum and Other Mouth                | 1    | 2.58 (0.07-14.37)             | 0      | 0                            |
| Floor of Mouth                                         | 0    | 0                             | 0      | 0                            |
| Gum and Other Mouth                                    | 1    | 3.65 (0.09-20.34)             | 0      | 0                            |
| Tonsil                                                 | 0    | 0                             | 0      | 0                            |
| Pharynx                                                | 0    | 0                             | 0      | 0                            |
| Nasopharynx                                            | 0    | 0                             | 0      | 0                            |
| Oropharynx                                             | 0    | 0                             | 0      | 0                            |
| Hypopharynx                                            | 0    | 0                             | 0      | 0                            |
| Other Oral Cavity and Pharynx                          | 0    | 0                             | 0      | 0                            |
| Digestive System                                       | 15   | 1.02 (0.57-1.68)              | 7      | 1.29 (0.52-2.66)             |
| Esophagus                                              | 1    | 0.82 (0.02-4.59)              | 0      | 0                            |
| Stomach                                                | 4    | 2.92 (0.8-7.48)               | 1      | 2.67 (0.07-14.85)            |
| Small Intestine                                        | 2    | 5.26 (0.64-19.01)             | 1      | 6.88 (0.17-38.31)            |
| Colon, Rectum and Anus                                 | 5    | 0.71 (0.23-1.65)              | 4      | 1.32 (0.36-3.39)             |
| Colon and Rectum                                       | 5    | 0.73 (0.24-1.7)               | 3      | 1.05 (0.22-3.07)             |
| Colon excluding Rectum                                 | 2    | 0.42 (0.05-1.51)              | 2      | 0.92 (0.11-3.31)             |
| Cecum                                                  | 0    | 0                             | 1      | 1.82 (0.05-10.16)            |
| Appendix                                               | 0    | 0                             | 0      | 0                            |
| Ascending Colon                                        | 1    | 1.1 (0.03-6.15)               | 0      | 0                            |
| Hepatic Flexure                                        | 0    | 0                             | 0      | 0                            |
| Transverse Colon                                       | 0    | 0                             | 0      | 0                            |
| Splenic Flexure                                        | 0    | 0                             | 0      | 0                            |
| Descending Colon                                       | 0    | 0                             | 0      | 0                            |
| Sigmoid Colon                                          | 1    | 0.76 (0.02-4.26)              | 1      | 2.18 (0.06-12.16)            |
| Large Intestine, NOS                                   | 0    | 0                             | 0      | 0                            |
| Rectum and Rectosigmoid Junction                       | 3    | 1.44 (0.3-4.2)                | 1      | 1.48 (0.04-8.27)             |
| Rectosigmoid Junction                                  | 0    | 0                             | 1      | 5.7 (0.14-31.74)             |
| Rectum                                                 | 3    | 1.9 (0.39-5.54)               | 0      | 0                            |
| Anus, Anal Canal and Anorectum                         | 0    | 0                             | 1      | 5.96 (0.15-33.18)            |
| Rectum, Rectosig Junct, Anus, Anal Canal and Anorectum | 3    | 1.31 (0.27-3.83)              | 2      | 2.38 (0.29-8.58)             |

|                                                          | Male |                                | Female |                                 |
|----------------------------------------------------------|------|--------------------------------|--------|---------------------------------|
|                                                          | O    | SIR (95% CI)                   | O      | SIR (95% CI)                    |
| SPM sites                                                |      |                                |        |                                 |
| Liver, Gallbladder, Intrahep Bile Duct and Other Biliary | 2    | 0.87 (0.11-3.15)               | 0      | 0                               |
| Liver                                                    | 0    | 0                              | 0      | 0                               |
| Gallbladder                                              | 0    | 0                              | 0      | 0                               |
| Intrahep and Extrahep Bile Ducts, and Other Biliary      | 2    | 3.8 (0.46-13.72)               | 0      | 0                               |
| Intrahepatic Bile Duct                                   | 1    | 5.83 (0.15-32.46)              | 0      | 0                               |
| Other Biliary                                            | 1    | 2.82 (0.07-15.69)              | 0      | 0                               |
| Pancreas                                                 | 1    | 0.44 (0.01-2.47)               | 1      | 1.03 (0.03-5.72)                |
| Retroperitoneum                                          | 0    | 0                              | 0      | 0                               |
| Peritoneum, Omentum and Mesentery                        | 0    | 0                              | 0      | 0                               |
| Other Digestive Organs                                   | 0    | 0                              | 0      | 0                               |
| Respiratory System                                       | 23   | 1.95 (1.24-2.92) <sup>1</sup>  | 5      | 1.11 (0.36-2.59)                |
| Nose, Nasal Cavity and Middle Ear                        | 0    | 0                              | 0      | 0                               |
| Larynx                                                   | 1    | 1.18 (0.03-6.58)               | 0      | 0                               |
| Pleura                                                   | 0    | 0                              | 0      | 0                               |
| Lung, Bronchus, Trachea, Mediastinum and Other Resp Org  | 22   | 2.03 (1.27-3.08) <sup>1</sup>  | 5      | 1.14 (0.37-2.66)                |
| Lung and Bronchus                                        | 22   | 2.04 (1.28-3.08) <sup>1</sup>  | 5      | 1.14 (0.37-2.67)                |
| Trachea                                                  | 0    | 0                              | 0      | 0                               |
| Mediastinum and Other Respiratory Organs                 | 0    | 0                              | 0      | 0                               |
| Bones and Joints                                         | 1    | 12.07 (0.31-67.24)             | 0      | 0                               |
| Soft Tissue including Heart                              | 2    | 4 (0.48-14.44)                 | 1      | 6.17 (0.16-34.38)               |
| Skin excluding Basal and Squamous                        | 44   | 8.06 (5.86-10.82) <sup>1</sup> | 15     | 11.10 (6.21-18.31) <sup>1</sup> |
| Melanoma of the Skin                                     | 42   | 8.42 (6.07-11.39) <sup>1</sup> | 15     | 12.16 (6.8-20.05) <sup>1</sup>  |
| Other Non-Epithelial Skin                                | 2    | 4.23 (0.51-15.27)              | 0      | 0                               |
| Breast                                                   | 0    | 0                              | 11     | 1.29 (0.64-2.3)                 |
| Female Breast                                            | 0    | 0                              | 11     | 1.29 (0.64-2.3)                 |
| Male Breast                                              | 0    | 0                              | 0      | 0                               |
| Female Genital System                                    | 0    | 0                              | 3      | 0.9 (0.18-2.62)                 |
| Cervix Uteri                                             | 0    | 0                              | 1      | 3.33 (0.08-18.53)               |
| Corpus and Uterus, NOS                                   | 0    | 0                              | 2      | 1.07 (0.13-3.88)                |
| Corpus Uteri                                             | 0    | 0                              | 2      | 1.11 (0.13-4)                   |
| Uterus, NOS                                              | 0    | 0                              | 0      | 0                               |
| Ovary                                                    | 0    | 0                              | 0      | 0                               |
| Vagina                                                   | 0    | 0                              | 0      | 0                               |
| Vulva                                                    | 0    | 0                              | 0      | 0                               |
| Other Female Genital Organs                              | 0    | 0                              | 0      | 0                               |
| Male Genital System                                      | 15   | 0.73 (0.41-1.2)                | 0      | 0                               |
| Prostate                                                 | 15   | 0.74 (0.41-1.22)               | 0      | 0                               |
| Testis                                                   | 0    | 0                              | 0      | 0                               |



| SPM sites                                     | Male |                               | Female |                                |
|-----------------------------------------------|------|-------------------------------|--------|--------------------------------|
|                                               | O    | SIR (95% CI)                  | O      | SIR (95% CI)                   |
| Penis                                         | 0    | 0                             | 0      | 0                              |
| Other Male Genital Organs                     | 0    | 0                             | 0      | 0                              |
| Urinary System                                | 11   | 1.15 (0.58-2.07)              | 4      | 2.42 (0.66-6.2)                |
| Urinary Bladder                               | 4    | 0.65 (0.18-1.67)              | 0      | 0                              |
| Kidney and Renal Pelvis                       | 6    | 1.91 (0.7-4.16)               | 4      | 5.03 (1.37-12.87) <sup>1</sup> |
| Renal Pelvis, Ureter and Other Urinary Organs | 1    | 2.27 (0.06-12.64)             | 0      | 0                              |
| Kidney                                        | 6    | 2.04 (0.75-4.45)              | 4      | 5.47 (1.49-14.02) <sup>1</sup> |
| Renal Pelvis                                  | 0    | 0                             | 0      | 0                              |
| Ureter                                        | 1    | 7.23 (0.18-40.27)             | 0      | 0                              |
| Other Urinary Organs                          | 0    | 0                             | 0      | 0                              |
| Eye and Orbit                                 | 0    | 0                             | 0      | 0                              |
| Eye and Orbit - Non-Melanoma                  | 0    | 0                             | 0      | 0                              |
| Eye and Orbit - Melanoma                      | 0    | 0                             | 0      | 0                              |
| Brain and Other Nervous System                | 1    | 1.12 (0.03-6.27)              | 1      | 3.18 (0.08-17.72)              |
| Brain                                         | 1    | 1.17 (0.03-6.49)              | 1      | 3.34 (0.08-18.61)              |
| Cranial Nerves Other Nervous System           | 0    | 0                             | 0      | 0                              |
| Endocrine System                              | 2    | 2.39 (0.29-8.65)              | 0      | 0                              |
| Thyroid                                       | 2    | 2.62 (0.32-9.47)              | 0      | 0                              |
| Thymus, Adrenal Gland and Other Endocrine     | 0    | 0                             | 0      | 0                              |
| Thymus                                        | 0    | 0                             | 0      | 0                              |
| Adrenal Gland                                 | 0    | 0                             | 0      | 0                              |
| Other Endocrine                               | 0    | 0                             | 0      | 0                              |
| All Lymphatic and Hematopoietic Diseases      | 20   | 2.68 (1.64-4.15) <sup>1</sup> | 4      | 1.57 (0.43-4.01)               |
| Lymphoma                                      | 7    | 1.88 (0.76-3.87)              | 0      | 0                              |
| Hodgkin Lymphoma                              | 0    | 0                             | 0      | 0                              |
| Hodgkin - Nodal                               | 0    | 0                             | 0      | 0                              |
| Hodgkin - Extranodal                          | 0    | 0                             | 0      | 0                              |
| Non-Hodgkin Lymphoma                          | 7    | 1.99 (0.8-4.11)               | 0      | 0                              |
| NHL - Nodal                                   | 5    | 2.13 (0.69-4.97)              | 0      | 0                              |
| NHL - Extranodal                              | 2    | 1.72 (0.21-6.21)              | 0      | 0                              |
| Myeloma                                       | 8    | 6.49 (2.8-12.8) <sup>1</sup>  | 3      | 7.38 (1.52-21.57) <sup>1</sup> |
| Leukemia                                      | 5    | 2 (0.65-4.67)                 | 1      | 1.3 (0.03-7.23)                |
| Lymphocytic Leukemia                          | 3    | 2.29 (0.47-6.7)               | 1      | 2.68 (0.07-14.95)              |
| Acute Lymphocytic Leukemia                    | 0    | 0                             | 0      | 0                              |
| Chronic Lymphocytic Leukemia                  | 3    | 2.63 (0.54-7.7)               | 1      | 3.06 (0.08-17.05)              |
| Other Lymphocytic Leukemia                    | 0    | 0                             | 0      | 0                              |
| Non-Lymphocytic Leukemia                      | 2    | 1.68 (0.2-6.08)               | 0      | 0                              |
| Acute Non-Lymphocytic Leukemia (ANLL)         | 1    | 1.26 (0.03-7.03)              | 0      | 0                              |
| Myeloid and Monocytic Leukemia                | 1    | 0.91 (0.02-5.08)              | 0      | 0                              |

| SPM sites                        | Male |                     | Female |                  |
|----------------------------------|------|---------------------|--------|------------------|
|                                  |      | SIR (95% CI)        |        | SIR (95% CI)     |
| Acute Myeloid Leukemia           | 1    | 1.4 (0.04-7.78)     | 0      | 0                |
| Acute Monocytic Leukemia         | 0    | 0                   | 0      | 0                |
| Chronic Myeloid Leukemia         | 0    | 0                   | 0      | 0                |
| Other Myeloid/Monocytic Leukemia | 0    | 0                   | 0      | 0                |
| Other Leukemia                   | 1    | 10.78 (0.27-60.08)  | 0      | 0                |
| Other Acute Leukemia             | 0    | 0                   | 0      | 0                |
| Aleukemic, Subleukemic and NOS   | 1    | 18.35 (0.46-102.23) | 0      | 0                |
| Mesothelioma                     | 1    | 3.34 (0.08-18.61)   | 0      | 0                |
| Kaposi Sarcoma                   | 0    | 0                   | 0      | 0                |
| Miscellaneous                    | 1    | 0.65 (0.02-3.64)    | 1      | 1.52 (0.04-8.47) |

<sup>†</sup>Indicated a statistically significant value; O: observed number; SIR: Standardized incidence ratio.
